# Supplementary material for: Public Perceptions concerning Responsibility for Climate Change Adaptation
Source: MDPI journal article supplement (doi:10.3390/su132212552), 2021-11-13
Supplement: s1 [file s1]

**Supplementary 1.** The complete questionnaire with all questions (Q) and statements (S), including identification numbers and response alternatives.

| <b>Id.no.</b> | <b>Question or statement</b>                                                                                                                                                                                                                                                                                       | <b>Response alternatives</b>                                                                                                                                                                          |
|---------------|--------------------------------------------------------------------------------------------------------------------------------------------------------------------------------------------------------------------------------------------------------------------------------------------------------------------|-------------------------------------------------------------------------------------------------------------------------------------------------------------------------------------------------------|
| <b>PART 1</b> |                                                                                                                                                                                                                                                                                                                    |                                                                                                                                                                                                       |
| Q1            | What year were you born?                                                                                                                                                                                                                                                                                           | Open-ended                                                                                                                                                                                            |
| Q2            | What gender do you identify with?                                                                                                                                                                                                                                                                                  | Nominal: male / female / other                                                                                                                                                                        |
| Q3            | What is the approximate level of yearly household income (before taxes)?                                                                                                                                                                                                                                           | Interval: 11 graded scale with intervals of 100.000 SEK                                                                                                                                               |
| Q4            | How many adults live in the household?                                                                                                                                                                                                                                                                             | Open-ended                                                                                                                                                                                            |
| Q5            | Are there children in the household?                                                                                                                                                                                                                                                                               | Nominal: yes / no / sometimes                                                                                                                                                                         |
| Q6            | What is your current accommodation?                                                                                                                                                                                                                                                                                | Nominal: rental / self-owned / other                                                                                                                                                                  |
| Q7            | → If you rent your accommodation, do you live as...                                                                                                                                                                                                                                                                | Nominal: tenant / lodger / other                                                                                                                                                                      |
| Q8            | → If you own your accommodation, do you live in a...                                                                                                                                                                                                                                                               | Nominal: condominium / self-owned property                                                                                                                                                            |
| Q9            | Do you live in a...                                                                                                                                                                                                                                                                                                | Nominal: large city center / large city outskirts / city center / city outskirts / larger village / smaller village / countryside                                                                     |
| Q10           | What municipality do you mainly live in?                                                                                                                                                                                                                                                                           | Nominal: Göteborg / Malmö / Skövde / Uddevalla / Vellinge / Ängelholm / other municipality                                                                                                            |
| Q11           | What level of education (finished or ongoing) do you have?                                                                                                                                                                                                                                                         | Nominal: not finished elementary school / elementary school or similar / high school (or similar) / post-high school education (not university or college) / university or college / doctoral studies |
| Q12           | How would you judge your general health condition?                                                                                                                                                                                                                                                                 | Ordinal: seven-graded Likert scale                                                                                                                                                                    |
| Q13           | What political party would you vote for, if the elections were today?                                                                                                                                                                                                                                              | Nominal: Social Democratic Party / Green Party / Center Party / Liberals / Moderate Party / Christian Democrats / Sweden Democrats / Left Party / Feminist Initiative / other party / do not know     |
| Q14           | Here we wish to know your principle view on the distribution of responsibility. How do you generally think that responsibility should be distributed?<br>a) Responsibility should be distributed equally.<br>b) The more one has to gain from the solving of a problem, the larger responsibility one should take. | Interval: five-graded Likert scale                                                                                                                                                                    |

- c) The larger guilt one has for the problem arising, the larger responsibility one should take.
- d) The more equipped one is to deal with the problem (in terms of money, knowledge, influence, etc.), the larger responsibility one should take.
- e) How responsibility is distributed does not matter, as long as the problem is solved.

## PART 2

|     |                                                                                                                                              |                                                                                                                                                                                                                                                                                        |
|-----|----------------------------------------------------------------------------------------------------------------------------------------------|----------------------------------------------------------------------------------------------------------------------------------------------------------------------------------------------------------------------------------------------------------------------------------------|
| Q15 | Have you personally experienced flooding?                                                                                                    | Nominal: yes / no / do not know                                                                                                                                                                                                                                                        |
| Q16 | → If yes, were have you experienced flooding?                                                                                                | Nominal: where I live / in areas where I move regularly / elsewhere                                                                                                                                                                                                                    |
| Q17 | → If yes, to what extent have the flooding caused you problems?                                                                              | Ordinal: seven-graded Likert-scale                                                                                                                                                                                                                                                     |
| Q18 | How actively do you think your municipality is working with climate adaptation, i.e. to mitigate the negative effects of climate change?     | Ordinal: seven-graded Likert-scale                                                                                                                                                                                                                                                     |
| Q19 | Have you, alone or together with others, done anything to adapt your accommodation to climate change?                                        | Nominal: yes / no / do not know                                                                                                                                                                                                                                                        |
| Q20 | How large possibilities do you think you have to adapt your accommodation to climate change?                                                 | Ordinal: seven-graded Likert-scale                                                                                                                                                                                                                                                     |
| Q21 | What do you perceive to be the largest barriers for you to adapt your accommodation to climate change? Give a maximum of three alternatives. | Nominal: my landlord / housing cooperative does not prioritize the issue / I cannot afford it / I lack time / I lack the stamina / I lack knowledge on what to do / I lack knowledge about the risks / I do not think it so important / I do not perceive any barriers / I do not know |
| Q22 | Do you think global climate change affects your surroundings in a positive way?                                                              | Ordinal: seven-graded Likert-scale                                                                                                                                                                                                                                                     |
| Q23 | Do you think global climate change affects your surroundings in a negative way?                                                              | Ordinal: seven-graded Likert-scale                                                                                                                                                                                                                                                     |
| Q24 | Do you think global climate change do not have any effects on your surroundings?                                                             | Ordinal: seven-graded Likert-scale                                                                                                                                                                                                                                                     |
| Q25 | Do you think you have experienced positive effects on your surrounding of global climate change?                                             | Ordinal: seven-graded Likert-scale                                                                                                                                                                                                                                                     |
| Q26 | Do you think you have experienced negative effects on your surrounding of global climate change?                                             | Ordinal: seven-graded Likert-scale                                                                                                                                                                                                                                                     |
| Q27 | Do you think you have not experienced any effects of global climate change?                                                                  | Ordinal: seven-graded Likert-scale                                                                                                                                                                                                                                                     |

| <b>PART 3A: To what degree do you agree with the following statements?</b> |                                                                                                                                                                                   |                                                 |
|----------------------------------------------------------------------------|-----------------------------------------------------------------------------------------------------------------------------------------------------------------------------------|-------------------------------------------------|
| S1                                                                         | Municipal inhabitants have a responsibility to influence the local government to implement adaptation measures to decrease flood risks.                                           | Ordinal: seven-graded Likert-scale; do not know |
| S2                                                                         | Municipal inhabitants have a responsibility to influence their landlord, housing collective, or neighbors to implement adaptation measures to decrease flood risks.               | Ordinal: seven-graded Likert-scale; do not know |
| S3                                                                         | Property owners should take responsibility themselves to decrease the flood risks for their property.                                                                             | Ordinal: seven-graded Likert-scale; do not know |
| S4                                                                         | Property owners should implement adaptation measures on their properties to decrease the flood risks for the neighborhood.                                                        | Ordinal: seven-graded Likert-scale; do not know |
| S5                                                                         | The local government should decide to what degree property owners are allowed to make changes to their properties that increase flood risks for the neighborhood.                 | Ordinal: seven-graded Likert-scale; do not know |
| S6                                                                         | The local government should give subsidies to property owners that cannot pay themselves for adaptation measures.                                                                 | Ordinal: seven-graded Likert-scale; do not know |
| S7                                                                         | If the local government decides that new properties are to be built in a manner decreasing flood risks, the local government should pay for the extra expenses.                   | Ordinal: seven-graded Likert-scale; do not know |
| S8                                                                         | Local governments with large financial capacity should contribute to climate adaptation measures by local governments with weak financial capacity.                               | Ordinal: seven-graded Likert-scale; do not know |
| S9                                                                         | Local governments in areas with small needs of climate adaptation should contribute to adaptation measures by local governments in areas with large needs.                        | Ordinal: seven-graded Likert-scale; do not know |
| S10                                                                        | The right to build in areas where there is a high flood risk should be limited by national regulation.                                                                            | Ordinal: seven-graded Likert-scale; do not know |
| S11                                                                        | The national government should give subsidies to local governments wanting to implement ambitious adaptation measures.                                                            | Ordinal: seven-graded Likert-scale; do not know |
| S12                                                                        | The national government should subsidize adaptation measures by local governments with weak financial capacity.                                                                   | Ordinal: seven-graded Likert-scale; do not know |
| S13                                                                        | The national government should give subsidies to local governments in areas with large needs of climate adaptation, regardless of the financial capacity of the local government. | Ordinal: seven-graded Likert-scale; do not know |

|                                                                                                                         |                                                                                                                                                      |                                                 |
|-------------------------------------------------------------------------------------------------------------------------|------------------------------------------------------------------------------------------------------------------------------------------------------|-------------------------------------------------|
| S14                                                                                                                     | Corporations active in Sweden and with large emissions of greenhouse gases should take on a larger responsibility for climate adaptation in society. | Ordinal: seven-graded Likert-scale; do not know |
| S15                                                                                                                     | Corporations active in Sweden should take on a larger responsibility for climate adaptation in society, as adaptation then becomes more efficient.   | Ordinal: seven-graded Likert-scale; do not know |
| <b>PART 3B: To what degree do you think actors need to take on responsibility for particular aspects of adaptation?</b> |                                                                                                                                                      |                                                 |
| S16                                                                                                                     | The responsibility for deciding whether one should build a property on land with a high flood risk should reside with...                             | Ordinal: seven-graded Likert-scale; do not know |
| S17                                                                                                                     | a) The property buyer                                                                                                                                |                                                 |
| S18                                                                                                                     | b) The developer                                                                                                                                     |                                                 |
| S19                                                                                                                     | c) The local government                                                                                                                              |                                                 |
|                                                                                                                         | d) The national government                                                                                                                           |                                                 |
| S20                                                                                                                     | The responsibility for informing the public about flood risks and possible adaptation measures should reside with                                    | Ordinal: seven-graded Likert-scale; do not know |
| S21                                                                                                                     | a) Local governments                                                                                                                                 |                                                 |
| S22                                                                                                                     | b) County administrative boards                                                                                                                      |                                                 |
| S23                                                                                                                     | c) The national government                                                                                                                           |                                                 |
| S24                                                                                                                     | d) Experts                                                                                                                                           |                                                 |
| S25                                                                                                                     | e) Media                                                                                                                                             |                                                 |
|                                                                                                                         | f) Non-profit organizations (like tenancy associations, environmental organizations and the Red Cross)                                               |                                                 |
| S26                                                                                                                     | g) Each individual, informing themselves                                                                                                             |                                                 |
| S27                                                                                                                     | The expenses related to flooding of property should be borne by:                                                                                     | Ordinal: seven-graded Likert-scale; do not know |
| S28                                                                                                                     | a) Property owners, even if they have implemented adaptation measures                                                                                |                                                 |
| S29                                                                                                                     | b) Property owners that have not implemented adaptation measures                                                                                     |                                                 |
| S30                                                                                                                     | c) Residents                                                                                                                                         |                                                 |
| S31                                                                                                                     | d) Insurance companies                                                                                                                               |                                                 |
| S32                                                                                                                     | e) The local government                                                                                                                              |                                                 |
|                                                                                                                         | f) The national government                                                                                                                           |                                                 |
| S33                                                                                                                     | It is better if decisions about climate adaptation measures are taken by:                                                                            | Ordinal: seven-graded Likert-scale; do not know |
| S34                                                                                                                     | a) Experts                                                                                                                                           |                                                 |
| S35                                                                                                                     | b) Politicians                                                                                                                                       |                                                 |
| S36                                                                                                                     | c) Each individual                                                                                                                                   |                                                 |
|                                                                                                                         | d) It does not matter, as long as the measures are efficient                                                                                         |                                                 |
| Q28                                                                                                                     | Do you trust climate change research?                                                                                                                | Ordinal: seven-graded Likert-scale; do not know |
